# Supplementary material
Source: PubMed Central journal article supplement (PMC1735432)
Supplement: jmedgene_40_4_242__1.pdf [file jmedgene_40_4_242__1.pdf]

Supplementary table 1 Chromosome 7q31 STR genotypes linked to L676Q

| Ethnicity | Subject | STR genotype     |                  |                   |
|-----------|---------|------------------|------------------|-------------------|
|           |         | D7S496           | D7S2459          | D7S2456           |
| Korean    | KF-3    | 133              | <u>139</u>       | <u>240</u>        |
| Mongolian | MD45    | <u>119</u> */129 | <u>139</u> †/145 | <u>240</u> ‡/248  |
|           | MD331   | <u>119</u> */133 | <u>139</u> †     | <u>240</u> ‡      |
|           | MD336   | <u>119</u> */129 | <u>139</u> †/145 | <u>240</u> ‡/242  |
|           | MD663   | <u>119</u> */121 | <u>139</u> †     | <u>240</u> ‡      |
|           | MC38    | <u>119</u> */133 | <u>139</u> †/145 | 238/ <u>240</u> ‡ |

STR genotypes are shown (allele sizes in bp) for six unrelated L676Q heterozygotes. Meiotic phase could not be assigned to define haplotypes in some subjects. Alleles in potential linkage disequilibrium with L676Q are underlined.

\*Significantly associated with L676Q in Mongolian subjects (p=0.0006).

†Significantly associated with L676Q in Mongolian subjects (p=0.00005).

‡Not significantly associated with L676Q in Mongolian subjects (p=0.057).
