# Supplementary material
Source: PubMed Central journal article supplement (PMC1735432)
Supplement: jmedgene_40_4_242__2.pdf [file jmedgene_40_4_242__2.pdf]

Supplementary table 2 Chromosome 7q31 STR genotypes linked to IVS7-2A>G

| Ethnicity | Subject | STR genotype |                           |         |
|-----------|---------|--------------|---------------------------|---------|
|           |         | D7S496       | D7S2459                   | D7S2456 |
| Korean    | KD22    | 117          | <u>145</u> *              | 242     |
|           |         | 119          | <u>145</u> *              | 242     |
|           | KD92    | 119/137      | 143/ <u>145</u> *         | 238/240 |
|           | KD93    | 119/137      | <u>145</u> / <u>145</u> * | 240/240 |
| Chinese   | CC4     | 129/131      | 143                       | 240     |
|           |         | 129/131      | <u>145</u>                | 240     |
|           | CH9     | 119/129      | 143/ <u>145</u>           | 242/242 |
|           | CG6     | 121/135      | 143/147                   | 240/242 |
| Japanese  | JB3     | 119/121      | <u>145</u> /147           | 238/240 |
|           | JB9     | 133/135      | <u>145</u> /147           | 240/246 |
|           | JC2     | 119/131      | <u>145</u> /147           | 240/242 |

STR genotypes are shown (allele sizes in bp) for six unrelated subjects who are homozygous (KD22 and CC4) or heterozygous for IVS7-2A>G. Meiotic phase could not be assigned to define haplotypes in most subjects.

\*The 145 bp allele of D7S2459 (underlined) is significantly associated with Korean IVS7-2A>G chromosomes (p=0.046).
